# Supplementary material
Source: HighWire-hosted journal article supplement (https://erj.ersjournals.com/content/50/2/1602493)
Supplement: inline-supplementary-material-1 [file inline-supplementary-material-1.pdf]

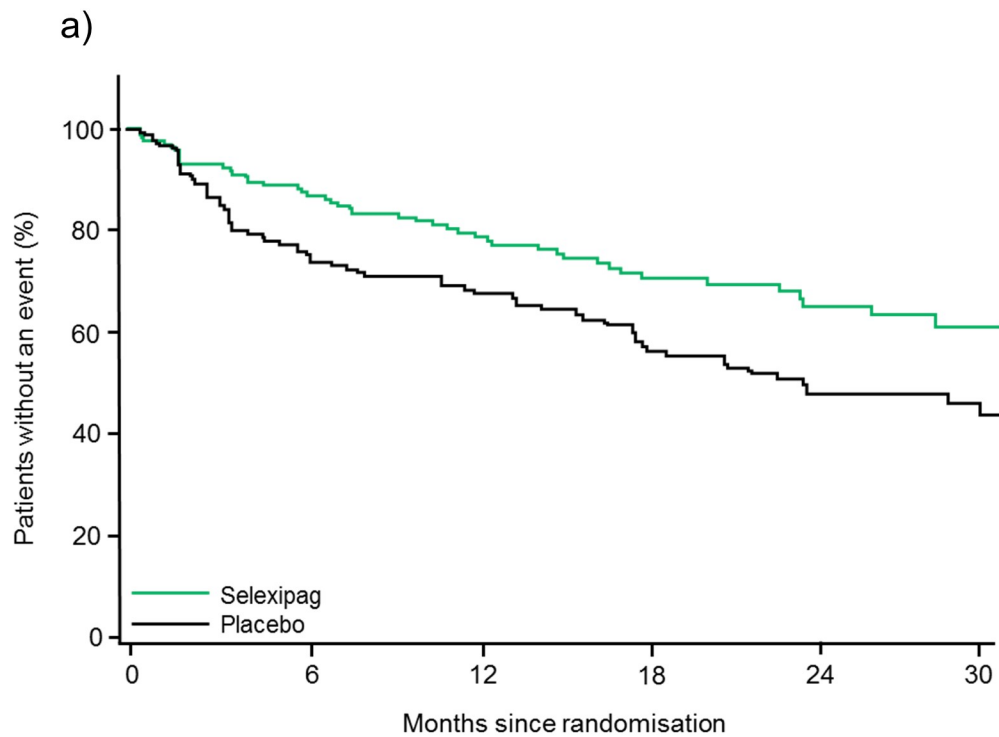

|           | Patients at risk |     |     |    |    |    |
|-----------|------------------|-----|-----|----|----|----|
|           | 0                | 6   | 12  | 18 | 24 | 30 |
| Selexipag | 167              | 129 | 102 | 70 | 44 | 21 |
| Placebo   | 167              | 114 | 92  | 57 | 38 | 21 |

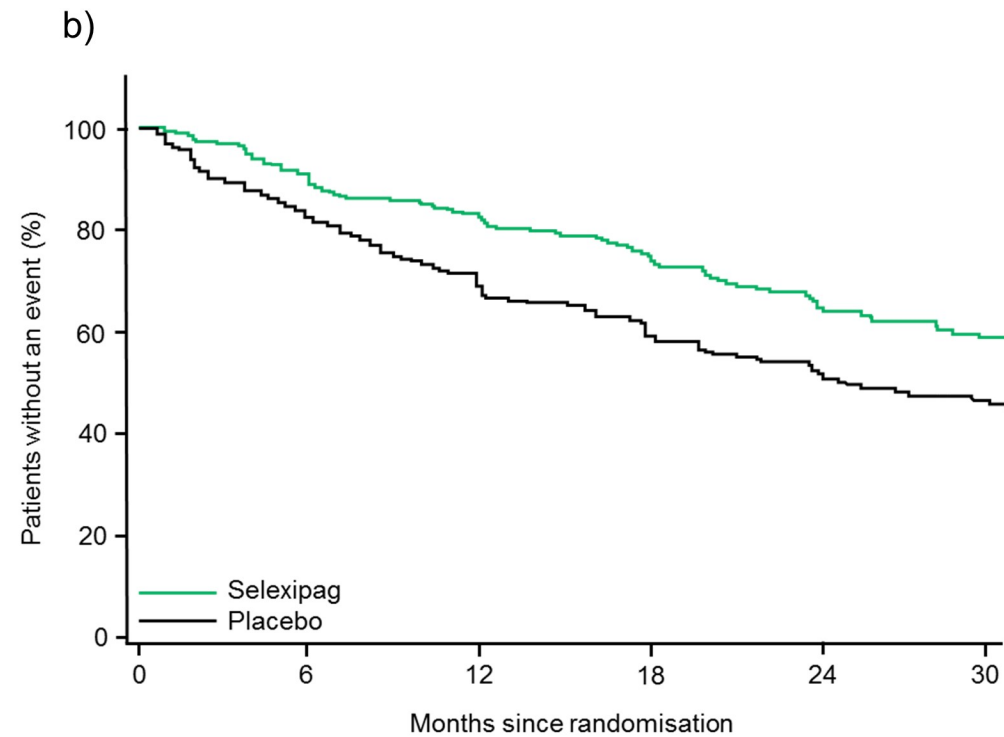

|           | Patients at risk |     |     |     |     |    |
|-----------|------------------|-----|-----|-----|-----|----|
|           | 0                | 6   | 12  | 18  | 24  | 30 |
| Selexipag | 325              | 258 | 204 | 143 | 104 | 68 |
| Placebo   | 350              | 268 | 212 | 136 | 90  | 54 |

Supplementary figure 1. Effect of selexipag on the primary composite endpoint of morbidity/mortality in patients with (a) PAH-CTD or (b) IPAH/HPAH.
