# Supplementary material
Source: HighWire-hosted journal article supplement (https://erj.ersjournals.com/content/50/2/1602493)
Supplement: inline-supplementary-material-2 [file inline-supplementary-material-2.pdf]

**Supplementary Table S1** Individualised maintenance dose

|                                    |                  | PAH-CTD                   |                             | PAH-SSc                  |                            | PAH-SLE                  |                            | PAH-MCTD/CTD-other       |                            |
|------------------------------------|------------------|---------------------------|-----------------------------|--------------------------|----------------------------|--------------------------|----------------------------|--------------------------|----------------------------|
| Dose groups                        | Twice-daily dose | Placebo<br>N=167<br>n (%) | Selexipag<br>N=167<br>n (%) | Placebo<br>N=93<br>n (%) | Selexipag<br>N=77<br>n (%) | Placebo<br>N=37<br>n (%) | Selexipag<br>N=45<br>n (%) | Placebo<br>N=37<br>n (%) | Selexipag<br>N=45<br>n (%) |
| Low-dose group<br>(200–400 µg)     | 200              | 6 (3.6)                   | 15 (9.0)                    | 5 (5.4)                  | 11 (14.3)                  | 0                        | 0                          | 1 (2.7)                  | 4 (8.9)                    |
|                                    | 400              | 8 (4.8)                   | 25 (15.0)                   | 4 (4.3)                  | 10 (13.0)                  | 2 (5.4)                  | 6 (13.3)                   | 2 (5.4)                  | 9 (20.0)                   |
| Medium-dose group<br>(600–1000 µg) | 600              | 6 (3.6)                   | 19 (11.4)                   | 2 (2.2)                  | 9 (11.7)                   | 3 (8.1)                  | 4 (8.9)                    | 1 (2.7)                  | 6 (13.3)                   |
|                                    | 800              | 8 (4.8)                   | 19 (11.4)                   | 5 (5.4)                  | 9 (11.7)                   | 1 (2.7)                  | 7 (15.6)                   | 2 (5.4)                  | 3 (6.7)                    |
|                                    | 1000             | 8 (4.8)                   | 7 (4.2)                     | 4 (4.3)                  | 3 (3.9)                    | 3 (8.1)                  | 1 (2.2)                    | 1 (2.7)                  | 3 (6.7)                    |
| High-dose group<br>(1200–1600 µg)  | 1200             | 6 (3.6)                   | 10 (6.0)                    | 2 (2.2)                  | 4 (5.2)                    | 1 (2.7)                  | 4 (8.9)                    | 3 (8.1)                  | 2 (4.4)                    |
|                                    | 1400             | 14 (8.4)                  | 14 (8.4)                    | 8 (8.6)                  | 7 (9.1)                    | 3 (8.1)                  | 5 (11.1)                   | 3 (8.1)                  | 2 (4.4)                    |
|                                    | 1600             | 108 (64.7)                | 51 (30.5)                   | 60 (64.5)                | 21 (27.3)                  | 24 (64.9)                | 17 (37.8)                  | 24 (64.9)                | 13 (28.9)                  |
| Other than per-protocol dosing     |                  | 2 (1.2)                   | 1 (0.6)                     | 2 (2.2)                  | 1 (1.3)                    | 0                        | 0                          | 0                        | 0                          |

One patient in the placebo group and six patients in the selexipag group had an individualised maintenance dose of 0 µg and are not reported here.

CTD: connective tissue disease; MCTD: mixed connective tissue disease; PAH: pulmonary arterial hypertension; SLE: systemic lupus erythematosus; SSc: systemic sclerosis.
