# Supplementary material
Source: HighWire-hosted journal article supplement (https://erj.ersjournals.com/content/50/2/1602493)
Supplement: inline-supplementary-material-4 [file inline-supplementary-material-4.pdf]

**Supplementary Table S3** Number of deaths from any cause up to end of study in the placebo and selexipag arms (intent-to-treat analysis) among patients with PAH-CTD

|                                      | <b>Placebo<br/>(N=167)</b> | <b>Selexipag<br/>(N=167)</b> |
|--------------------------------------|----------------------------|------------------------------|
| <b>Cumulative all-cause deaths n</b> |                            |                              |
| Month 6 (Week 26)                    | 8                          | 9                            |
| Month 12                             | 18                         | 16                           |
| Month 18                             | 23                         | 22                           |
| Month 24                             | 29                         | 28                           |
| End of study                         | 34                         | 33                           |

CTD: connective tissue disease; PAH: pulmonary arterial hypertension
