# Supplementary material
Source: HighWire-hosted journal article supplement (https://erj.ersjournals.com/content/50/2/1602493)
Supplement: inline-supplementary-material-6 [file inline-supplementary-material-6.pdf]

**Supplementary Table S5** Change from baseline in 6-minute walk distance at Week 26

|                                     | Placebo |                                     |                             | Selexipag |                                     |                             | Treatment effect<br>m (95% CI)* |
|-------------------------------------|---------|-------------------------------------|-----------------------------|-----------|-------------------------------------|-----------------------------|---------------------------------|
|                                     | N       | Median at<br>baseline<br>m (Q1, Q3) | Median change<br>m (Q1, Q3) | N         | Median at<br>baseline<br>m (Q1, Q3) | Median change<br>m (Q1, Q3) |                                 |
| <b>PAH-CTD</b>                      | 167     | 359<br>(275, 401)                   | -10<br>(-199, 17)           | 167       | 370<br>(307, 408)                   | -2<br>(-100, 27)            | 12 (-4, 27)                     |
| <b>PAH-SSc</b>                      | 93      | 338<br>(268, 387)                   | -22<br>(-230, 8)            | 77        | 360<br>(291, 400)                   | -13<br>(-93, 23)            | 15 (-8, 42)                     |
| <b>PAH-SLE</b>                      | 37      | 397<br>(337, 420)                   | 1<br>(-100, 21)             | 45        | 391<br>(360, 414)                   | 16<br>(-10, 35)             | 17 (-8, 44)                     |
| <b>PAH-<br/>MCTD/<br/>CTD-other</b> | 37      | 369<br>(263, 399)                   | -2<br>(-167, 30)            | 45        | 360<br>(310, 401)                   | -9<br>(-240, 23)            | -11 (-45, 23)                   |

\*Point estimate for location shift as estimated by Hodges-Lehmann method; missing 6-minute walk distance values were imputed according to a worst-case scenario as described previously [10].

CTD: connective tissue disease; MCTD: mixed connective tissue disease; PAH: pulmonary arterial hypertension; SLE: systemic lupus erythematosus; SSc: systemic sclerosis.
