# Supplementary material
Source: HighWire-hosted journal article supplement (https://erj.ersjournals.com/content/50/2/1602493)
Supplement: inline-supplementary-material-9 [file inline-supplementary-material-9.pdf]

**Supplementary Table S8** Prostacyclin-associated adverse events reported in the study titration and maintenance periods for PAH-CTD subtypes

|                                                                         | Titration        |                   | Maintenance     |                   |
|-------------------------------------------------------------------------|------------------|-------------------|-----------------|-------------------|
|                                                                         | Placebo<br>N=91* | Selexipag<br>N=77 | Placebo<br>N=75 | Selexipag<br>N=64 |
| <b>PAH-SSc</b>                                                          |                  |                   |                 |                   |
| Patients with $\geq 1$ PGI <sub>2</sub> -associated adverse event n (%) | 60 (65.9)        | 66 (85.7)         | 40 (53.3)       | 42 (65.6)         |
| Adverse event n (%)                                                     |                  |                   |                 |                   |
| Headache                                                                | 29 (31.9)        | 41 (53.2)         | 14 (18.7)       | 19 (29.7)         |
| Diarrhoea                                                               | 18 (19.8)        | 28 (36.4)         | 13 (17.3)       | 22 (34.4)         |
| Nausea                                                                  | 18 (19.8)        | 20 (26.0)         | 11 (14.7)       | 9 (14.1)          |
| Vomiting                                                                | 2 (2.2)          | 3 (3.9)           | 1 (1.3)         | 3 (4.7)           |
| Pain in extremity                                                       | 2 (2.2)          | 16 (20.8)         | 2 (2.7)         | 9 (14.1)          |
| Pain in jaw                                                             | 3 (3.3)          | 14 (18.2)         | 6 (8.0)         | 12 (18.8)         |
| Dizziness                                                               | 9 (9.9)          | 9 (11.7)          | 12 (16.0)       | 10 (15.6)         |
| Myalgia                                                                 | 5 (5.5)          | 9 (11.7)          | 4 (5.3)         | 3 (4.7)           |
| Flushing                                                                | 4 (4.4)          | 4 (5.2)           | 1 (1.3)         | 3 (4.7)           |
| Arthralgia                                                              | 4 (4.4)          | 6 (7.8)           | 2 (2.7)         | 5 (7.8)           |
| Musculoskeletal pain                                                    | 1 (1.1)          | 4 (5.2)           | 2 (2.7)         | 3 (4.7)           |
| <b>PAH-SLE</b>                                                          | <b>N=37</b>      | <b>N=45</b>       | <b>N=33</b>     | <b>N=40</b>       |
| Patients with $\geq 1$ PGI <sub>2</sub> -associated adverse event n (%) | 22 (59.5)        | 39 (86.7)         | 18 (54.5)       | 33 (82.5)         |
| Adverse event n (%)                                                     |                  |                   |                 |                   |
| Headache                                                                | 9 (24.3)         | 31 (68.9)         | 5 (15.2)        | 19 (47.5)         |
| Diarrhoea                                                               | 7 (18.9)         | 12 (26.7)         | 6 (18.2)        | 7 (17.5)          |
| Nausea                                                                  | 6 (16.2)         | 17 (37.8)         | 4 (12.1)        | 13 (32.5)         |
| Vomiting                                                                | 4 (10.8)         | 15 (33.3)         | 2 (6.1)         | 7 (17.5)          |
| Pain in extremity                                                       | 2 (5.4)          | 5 (11.1)          | -               | 4 (10.0)          |
| Pain in jaw                                                             | 1 (2.7)          | 5 (11.1)          | -               | 5 (12.5)          |
| Dizziness                                                               | 5 (13.5)         | 5 (11.1)          | 6 (18.2)        | 7 (17.5)          |
| Myalgia                                                                 | 2 (5.4)          | 5 (11.1)          | 1 (3.0)         | 4 (10.0)          |
| Flushing                                                                | 3 (8.1)          | 6 (13.3)          | 2 (6.1)         | 5 (12.5)          |
| Arthralgia                                                              | 3 (8.1)          | 3 (6.7)           | 1 (3.0)         | 2 (5.0)           |
| Musculoskeletal pain                                                    | -                | -                 | -               | -                 |
| <b>PAH-MCTD/CTD-other</b>                                               | <b>N=37</b>      | <b>N=45</b>       | <b>N=34</b>     | <b>N=38</b>       |
| Patients with $\geq 1$ PGI <sub>2</sub> -associated adverse event n (%) | 25 (67.6)        | 38 (84.4)         | 15 (44.1)       | 28 (73.7)         |
| Adverse event n (%)                                                     |                  |                   |                 |                   |
| Headache                                                                | 18 (48.6)        | 28 (62.2)         | 7 (20.6)        | 17 (44.7)         |
| Diarrhoea                                                               | 4 (10.8)         | 14 (31.1)         | 4 (11.8)        | 9 (23.7)          |
| Nausea                                                                  | 9 (24.3)         | 16 (35.6)         | 3 (8.8)         | 9 (23.7)          |
| Vomiting                                                                | 1 (2.7)          | 10 (22.2)         | 1 (2.9)         | 5 (13.2)          |
| Pain in extremity                                                       | 2 (5.4)          | 6 (13.3)          | 2 (5.9)         | 5 (13.2)          |
| Pain in jaw                                                             | 3 (8.1)          | 3 (6.7)           | -               | 2 (5.3)           |
| Dizziness                                                               | 4 (10.8)         | 6 (13.3)          | 4 (11.8)        | 4 (10.5)          |
| Myalgia                                                                 | -                | 6 (13.3)          | -               | 3 (7.9)           |

|                      |         |          |         |          |
|----------------------|---------|----------|---------|----------|
| Flushing             | -       | 5 (11.1) | -       | 4 (10.5) |
| Arthralgia           | 3 (8.1) | 2 (4.4)  | 1 (2.9) | 8 (21.1) |
| Musculoskeletal pain | 2 (5.4) | 3 (6.7)  | 3 (8.8) | 2 (5.3)  |

\*Among the patients randomly assigned to the placebo group, two did not receive study treatment and were not included in the safety analysis set.

A patient with multiple occurrences of an adverse event during one treatment period is counted only once in the adverse event category for that treatment and period.

CTD: connective tissue disease; MCTD: mixed connective tissue disease; PAH: pulmonary arterial hypertension; SLE: systemic lupus erythematosus; SSc: systemic sclerosis.
